# Supplementary material for: Symbionts as Major Modulators of Insect Health: Lactic Acid Bacteria and Honeybees
Source: PLoS One. 2012 Mar 12;7(3):e33188. doi: 10.1371/journal.pone.0033188 (PMC3299755; doi:10.1371/journal.pone.0033188)
Supplement: Table S1 — The microbial composition of the flowers of 15 Angiosperma (left column) frequently visited by Apis mellifera bees in Sweden. Fifty five different species of bacteria and 5 yeast species from the flowers were analysed in vitro against all 13 honey crop LAB from A. mellifera grown individually and together (right column). Inhibition zones are displayed as diameter in millimetres. Zero indicates no inhibition and (-) indicates no result. (DOC) [file pone.0033188.s001.doc]

**Table S1. Inhibition tests of honey crop LAB against microbes from flowers.**

| **Isolates of bacteria and yeasta** | **Sampled flowerb** | **Most closely related type strainc** | **Compared sequence length and % similarityd** | **Bin7** | **Bin2** | **Hma3** | **Bma6** | **Hon2** | **Hma11** | **Bin4** | **Fhon13** | **Fhon2** | **Hma8** | **Bma5** | **Biut2** | **Hma2** | **All 13** |
| --- | --- | --- | --- | --- | --- | --- | --- | --- | --- | --- | --- | --- | --- | --- | --- | --- | --- |
| ljubL1r (JN167926) | *Calluna vulgaris* (Heather) | *Lactobacillus kunkeei* YH-15T (Y11374) | 832 (93.4) | 0 | 0 | 0 | 0 | 0 | 0 | 11 | 9 | 12 | 0 | 0 | 0 | 0 | 13 |
| ljubL4to (JN167928) | *Calluna vulgaris* (Heather) | *Lactobacillus concavus* AS 1.5017T (AY683322) | 768 (88.3) | 0 | 0 | 0 | 0 | 0 | 8 | 0 | 7 | 8 | 0 | 0 | 0 | 0 | 12 |
| ljubL4ap (JN167933) | *Calluna vulgaris* (Heather) | *Leuconostoc pseudomesenteroides* NRIC 1777T (AB023237) | 827 (99.2) | 0 | 0 | 0 | 0 | 10 | 0 | 7 | 0 | 8 | 0 | 0 | 0 | 0 | 12 |
| ljubL3ap (JN167935) | *Calluna vulgaris* (Heather) | *Leuconostoc holzapfelii* LMG 23990T (AM600682) | 777 (99.6) | 0 | 0 | 0 | 0 | 6 | 8 | 6 | 10 | 11 | 0 | 0 | 0 | 0 | 15 |
| ljubL8ts (JN167963) | *Calluna vulgaris* (Heather) | *Asaia siamensis* S60-1T (AB035416) | 860 (99.3) | 0 | 0 | 0 | 0 | 21 | 0 | 15 | 0 | 16 | 0 | 0 | 0 | 0 | - |
| smltbL2ap (JN167929) | *Fragaria vesca* (Wild strawberry) | *Carnobacterium gallinarum* DSM 4847T (AJ387905) | 875 (98.7) | 6 | 7 | 8 | 8 | 0 | 13 | 0 | 19 | 9 | 0 | 7 | 8 | 8 | 26 |
| smltbL5ts (JN167961) | *Fragaria vesca* (Wild strawberry) | *Variovorax boronicumulans* BAM-48T (AB300597) | 794 (98.7) | 20 | 20 | 22 | 18 | 20 | 30 | 30 | 38 | 36 | 12 | 12 | 14 | 18 | - |
| smltbL10ts (JN167962) | *Fragaria vesca* (Wild strawberry) | *Sphingomonas aurantiaca* MA101bT (AJ429236) | 829 (99.9) | - | - | - | - | 17 | 10 | 10 | 0 | 12 | - | - | - | - | 17 |
| smltbL9ts (JN167957) | *Fragaria vesca*  (Wild strawberry) | *Pseudomonas agarici* LMG 2112T (Z76652) | 844 (98.9) | 6 | 7 | 6 | 6 | 0 | 20 | 0 | 11 | 16 | 0 | 0 | 0 | 0 | 19 |
| murgbL4ap (JN167931) | *Hedera helix* (Ivy) | *Leuconostoc fallax* DSM 20189T (AF360738) | 559 (96.6) | 0 | 0 | 0 | 0 | 0 | 12 | 0 | 11 | 11 | 0 | 0 | 0 | 0 | 10 |
| murgBL2ap (JN167932) | *Hedera helix* (Ivy) | *Fructobacillus fructosus* DSM 20349T (AF360737) | 842 (99.5) | 0 | 0 | 0 | 0 | 0 | 13 | 7 | 14 | 14 | 0 | 0 | 0 | 0 | 11 |
| murgBL2to (JN167936) | *Hedera helix* (Ivy) | *Fructobacillus pseudoficulneus* LC51T (AY169967) | 633 (92.3) | 6 | 0 | 6 | 5 | 0 | 10 | 0 | 10 | 12 | 0 | 0 | 0 | 0 | 12 |
| murgBL2ts (JN167940) | *Hedera helix* (Ivy) | *Erwinia tasmaniensis* Et1/99T (AM055716) | 766 (97.8) | 17 | 13 | 12 | 12 | 14 | 24 | 8 | 25 | 25 | 7 | 8 | 15 | 10 | 25 |
| murgBL3ts (JN167968) | *Hedera helix* (Ivy) | *Curtobacterium flaccumfaciens* LMG 3645T (AJ312209) | 884 (99.7) | 9 | 9 | 9 | 12 | 8 | 16 | 0 | 28 | 30 | 0 | 12 | 13 | 7 | 28 |
| vpabL2to (JN167927) | *Pyrus communis* (Pear) | *Lactobacillus lindneri* DSM 20690T (X95421) | 785 (99.7) | 0 | 0 | 0 | 0 | 0 | 20 | 0 | 8 | 10 | 7 | 11 | 9 | 9 | 13 |
| vpabLja1a (JN167985) | *Pyrus communis* (Pear) | *Metschnikowia pulcherrima* NRRL Y-7111T (U45736) | 446 (97.3) | 0 | 0 | 0 | 0 | 0 | 7 | 0 | 0 | 8 | 0 | 0 | 0 | 0 | 8 |
| blhbL1r (JN167934) | *Rubus caesius* (Dewberry) | *Leuconostoc mesenteroides* ATCC 8293T (CP000414) | 856 (99.6) | 0 | 0 | 0 | 0 | 9 | 0 | 8 | 0 | 10 | 0 | 0 | 0 | 0 | 10 |
| blhbL8ap (JN167939) | *Rubus caesius* (Dewberry) | *Erwinia persicina* ATCC 35998T (U80205) | 802 (99.0) | 11 | 13 | 11 | 0 | 9 | 20 | 8 | 22 | 22 | 8 | 16 | 7 | 13 | 16 |
| blhbL2ts (JN167945) | *Rubus caesius* (Dewberry) | *Cedecea davisae* DSM 4568T (AF493976) | 845 (99.3) | 6 | 0 | 0 | 0 | 6 | 17 | 0 | 18 | 23 | 5 | 7 | 8 | 7 | 28 |
| blhbL4ap (JN167945) | *Rubus caesius* (Dewberry) | *Yersinia kristensenii* ATCC 33638T (AF366381) | 838 (99.3) | 0 | 0 | 0 | 0 | 11 | 29 | 0 | 20 | 24 | 7 | 11 | 0 | 9 | 25 |
| blhabL5ts (JN167959) | *Rubus caesius* (Dewberry) | *Acinetobacter johnsonii* ATCC 17909T (Z93440) | 836 (95.3) | 0 | 0 | 0 | 0 | 0 | 11 | 0 | 12 | 14 | 10 | 14 | 10 | 13 | 17 |
| bl_hBL9ts (JN167973) | *Rubus caesius* (Dewberry) | *Micrococcus luteus* DSM 20030T (AJ536198) | 802 (100) | 11 | 14 | 18 | 12 | 10 | 18 | 7 | 20 | 29 | 8 | 9 | 10 | 9 | 40 |
| hallbL2ap (JN167938) | *Rubus idaeus* (Raspberry) | *Erwinia rhapontici* DSM 4484T (AJ233417) | 846 (99.5) | 10 | 8 | 9 | 9 | 8 | 15 | 0 | 22 | 32 | 0 | 0 | 0 | 0 | 22 |
| hallbL4ap (JN167949) | *Rubus idaeus* (Raspberry) | *Pseudomonas flectens* ATCC 12775T (AB021400) | 890 (96.1) | 0 | 0 | 0 | 0 | 0 | 22 | 0 | 18 | 22 | 9 | 10 | 9 | 9 | 14 |
| hallbL9ts (JN167960) | *Rubus idaeus* (Raspberry) | *Xanthomonas arboricola* LMG 747T (Y10757) | 918 (99.2) | 7 | 5 | 5 | 5 | 0 | 0 | 0 | 0 | 16 | 0 | 0 | 7 | 7 | 18 |
| hallbL5ts (JN167974) | *Rubus idaeus* (Raspberry) | *Kocuria marina* KMM 3905T (AY2113859) | 737 (99.7) | 10 | 0 | 5 | 7 | 0 | 13 | 0 | 16 | 23 | 0 | 0 | 0 | 0 | 42 |
| rspbjbbLj5 (JN167982) | *Rubus radula* (Raspberry) | *Aureobasidium pullulans* CBS 100524T (FJ150952) | 519 (100) | 0 | 0 | 0 | 0 | 0 | 0 | 14 | 12 | 11 | 0 | 0 | 0 | 0 | 10 |
| rspbjbbLj3 (JN167981) | *Rubus radula* (Raspberry) | *Rhodotorula fujisanensis* CBS4551T (AF189928) | 536 (100) | 0 | 0 | 0 | 0 | 0 | 14 | 0 | 15 | 20 | 0 | 0 | 0 | 0 | 9 |
| vitkbL6ap (JN167941) | *Trifolium repens* (White clover) | *Pantoea agglomerans* DSM 3493T (AJ233423) | 914 (98.2) | 13 | 11 | 11 | 9 | 11 | 20 | 8 | 24 | 42 | 10 | 8 | 10 | 6 | 30 |
| vitkbL1ap (JN167947) | *Trifolium repens* (White clover) | *Serratia grimesii* DSM 30063T (AJ233430) | 861 (98.7) | 8 | 0 | 5 | 10 | 6 | 12 | 0 | 12 | - | 0 | 0 | 0 | 6 | 22 |
| vitkbL3tsb (JN167954) | *Trifolium repens* (White clover) | *Pseudomonas graminis* DSM 11363T (Y11150) | 849 (100) | 8 | 10 | 10 | 10 | - | - | - | - | 22 | 0 | 0 | 0 | 0 | - |
| vitklbL9ts (JN167979) | *Trifolium repens* (White clover) | *Pseudomonas trivialis* DSM 14937T (AJ492831) | 731 (100) | 12 | 13 | 11 | 11 | 11 | 23 | 30 | 30 | 32 | 30 | 30 | 30 | 30 | - |
| vitkbL11ts (JN167965) | *Trifolium repens* (White clover) | *Agreia pratensis* P 229/10T (AJ310412) | 745 (99.7) | 20 | 14 | 21 | 20 | 30 | 30 | 30 | 30 | 40 | 16 | 14 | 16 | 15 | 30 |
| maskros1ap (JN167937) | *Taraxacum* sect*. Hamata* (Dandelion) | *Erwinia persicina* ATCC 35998T (U80205) | 865 (98.7) | - | - | - | - | - | - | - | - | - | 0 | 6 | 10 | 10 | - |
| mskroBL2a (JN167951) | *Taraxacum* sect*.Hamata* (Dandelion) | *Pseudomonas veronii* CIP 104663T (AF064460) | 844 (99.9) | - | - | - | - | - | - | - | - | 32 | - | - | - | - | 38 |
| mskrsBL7ts (JN167952) | *Taraxacum* sect. *Hamata* (Dandelion) | *Pseudomonas cichorii* LMG 2162T (Z76658) | 509 (98.6) | 15 | 8 | 7 | 7 | 8 | 8 | 0 | 9 | - | - | - | - | - | - |
| maskbL1to (JN167944) | *Taraxacum* sect. *Hamata* (Dandelion) | *Raoultella planticola* ATCC 33531T (AF129443) | 570 (97.0) | 12 | 8 | 8 | 11 | 11 | 22 | 0 | 26 | 16 | 0 | 7 | 8 | 9 | - |
| maskbL4tsb (JN167956) | *Taraxacum* sect. *Hamata* (Dandelion) | *Pseudomonas abietaniphila* ATCC 700689T (AJ011504) | 817 (97.7) | 18 | 17 | 11 | 12 | 0 | 32 | 12 | 43 | - | 10 | 10 | 11 | 6 | 39 |
| maskbL8ts (JN167971) | *Taraxacum* sect. *Hamata* (Dandelion) | *Microbacterium hominis* DSM 12509T (AM181504) | 597 (97.2) | 12 | 8 | 9 | 11 | 19 | 32 | 32 | 22 | 24 | 5 | 8 | 8 | 7 | 11 |
| mskroBL6ap (JN167975) | *Taraxacum* sect. *Hamata* (Dandelion) | *Sanguibacter inulinus* ST50T (X79451) | 879 (99.5) | 18 | 18 | 22 | 16 | 14 | 32 | 12 | 32 | 36 | 12 | 13 | 10 | 8 | 26 |
| mskroBL5ap (JN167958) | *Taraxacum* sect. *Hamata* (Dandelion) | *Pseudomonas umsongensis* Ps 3-10T (AF468450) | 879 (98.5) | 8 | 12 | 8 | 5 | 12 | 26 | 10 | 23 | 28 | 18 | - | 18 | - | - |
| slg7bF (JN167950) | *Salix caprea*  (Goat Willow) | *Pseudomonas cannabina* CFBP 2341T (AJ492827) | 780 (99.6) | 6 | 6 | 7 | 12 | 32 | 26 | 7 | 24 | 31 | 24 | 16 | 18 | 22 | - |
| slg2bF (JN167955) | *Salix caprea*  (Goat Willow) | *Pseudomonas koreensis* Ps 9-14T (AF468452) | 802 (97.8) | - | 14 | - | 14 | - | - | - | 8 | 48 | - | - | - | - | - |
| slg1bF (JN167964) | *Salix caprea*  (Goat Willow) | *Frigoribacterium faeni* 801T (Y18807) | 882 (99.5) | 28 | 18 | 18 | 22 | 24 | 40 | 30 | 48 | 30 | - | - | - | - | 39 |
| slg5bF (JN167967) | *Salix caprea*  (Goat Willow) | *Frondihabitans australicus* E1HC-02T (DQ525859) | 876 (97.0) | 12 | 10 | 7 | 12 | 10 | 16 | 7 | 16 | 23 | 9 | 13 | 12 | 13 | - |
| ralrobL8ts (JN167942) | *Epilobium angustifolium* (Rosebay Willowherb) | *Pantoea ananatis* ATCC 33244T (U80196) | 734 (99.9) | 13 | 10 | 11 | 13 | 15 | 25 | 10 | 34 | 34 | 0 | 0 | 0 | 0 | 30 |
| ralrobL1ts (JN167966) | *Epilobium angustifolium* (Rosebay Willowherb) | *Lactococcus lactis* NCDO 607T (AB100802) | 912 (91.8) | 5 | 6 | 5 | 5 | 7 | 17 | 0 | 14 | 18 | 0 | 5 | 5 | 6 | 14 |
| ralroja3 (JN167980) | *Epilobium angustifolium* (Rosebay Willowherb) | *Metschnikowia reukaufii* NRRL Y-7112T (U44825) | 454 (99.6) | 0 | 0 | 0 | 0 | 0 | 0 | 0 | 0 | 7 | - | - | - | - | 7 |
| blklbL1to (JN167948) | *Centaurea cyanus* (Cornflower) | *Brenneria quercina* DSM 4561T (AJ233416) | 722 (97.1) | 9 | 7 | 7 | 9 | 10 | 26 | 12 | 32 | 32 | 0 | 0 | 7 | 0 | 30 |
| sktrBL10ts (JN167969) | *Lonicera xylosteum* (Fly Honey-suckle) | *Plantibacter flavus* P297/02T (AJ310417) | 820 (99.6) | 12 | 8 | 8 | 8 | 7 | 9 | 6 | 14 | 21 | 0 | 8 | 8 | 8 | - |
| sktrBL11ts (JN167970) | *Lonicera xylosteum* (Fly Honey-suckle) | *Microbacterium hydrocarbonoxydans* DSM 16089T (AJ698726) | 690 (96.8) | 20 | 16 | 15 | 20 | 16 | 33 | 9 | 25 | 33 | 7 | 9 | 11 | 5 | 38 |
| sktrbL8ts (JN167972) | *Lonicera xylosteum* (Fly Honey-suckle) | *Microbacterium profundi* Shh49T (EF623999) | 511 (98.0) | 13 | 13 | 15 | 13 | 13 | 23 | 12 | 23 | 36 | 0 | 8 | 8 | 14 | 26 |
| sktrbl7ts (JN167976) | *Lonicera xylosteum* (Fly Honey-suckle) | *Rhodococcus erythropolis* DSM 43066T (X79289) | 585 (99.9) | 10 | 0 | 0 | 0 | 6 | 16 | 9 | 14 | 22 | 0 | 0 | 0 | 0 | 19 |
| sktbL13ts (JN167977) | *Lonicera xylosteum* (Fly Honey-suckle) | *Rhodococcus globerulus* DSM 4954T (X80619) | 698 (99.4) | 20 | 9 | 7 | 9 | 0 | 20 | 0 | 26 | 40 | 16 | 12 | 20 | 12 | 21 |
| sktrBL12ts (JN167978) | *Lonicera xylosteum* (Fly Honey-suckle) | *Pedobacter heparinus* DSM 2366T (AJ438172) | 777 (97.8) | 20 | 15 | 14 | 14 | 16 | 24 | 0 | 26 | 37 | 8 | 8 | 9 | 0 | 32 |
| grvapbL4ap (JN167943) | *Malus domestica* (Apple) | *Pantoea agglomerans* DSM 3493T (AJ233423) | 820 (96.8) | 14 | 14 | 13 | 9 | 42 | 18 | 28 | 20 | 33 | 0 | 0 | 7 | 7 | 47 |
| grvapbL4ts (JN167953) | *Malus domestica* (Apple) | *Pseudomonas rhizosphaerae* IH5T (AY152673) | 794 (97.7) | - | - | - | - | 0 | 0 | 10 | 18 | 18 | - | - | - | - | 16 |
| rvabL2bts (JN167930) | *Malus domestica* (Apple) | *Bacillus simplex* DSM 1321T (AJ439078) | 814 (99.6) | 0 | 0 | 0 | 0 | 0 | 15 | 0 | 11 | 15 | 12 | 13 | 14 | 16 | 14 |
| grvapbLja7 (JN167984) | *Malus domestica* (Apple) | *Cryptococcus victoria* CBS 8685T (AF363647) | 544 (98.7) | 10 | 9 | 9 | 14 | 9 | 20 | 0 | 18 | 18 | 15 | 6 | 8 | 13 | - |
| skogslind 3 (JN167983) | *Tilia cordata*  (Small-Leaved Lime) | *Candida rancensis* CBS 8174T (AJ508580) | 455 (100) | 0 | 0 | 0 | 0 | 0 | 8 | 0 | 10 | 11 | 0 | 0 | 0 | 0 | 9 |

aGenBank accession numbers are shown in parentheses (JN167926-JN167985).

bThe flower names in Latin following their English names displayed in parentheses.

cGenBank accession numbers of type strains are shown in parentheses.

dThe similarity to closest sequence match of bacterial and yeast type strains is shown within parentheses as a percentage of base pair matches in the respectively partial 16S rRNA and 26S rRNA genes, established by comparing the bacterial sequences in the database of Ribosomal Database project II (http://rdp.cme.msu.edu/) and the yeast sequences with BLAST (http://blast.ncbi.nlm.nih.gov/Blast.cgi) in GenBank.
